# Supplementary material for: A long pentraxin-3-derived pentapeptide for the therapy of FGF8b-driven steroid hormone-regulated cancers
Source: PubMed Central journal article supplement (PMC4537050; doi:10.18632/oncotarget.3831), 2015-04-14
Supplement: oncotarget-06-13790-s001.pdf [file oncotarget-06-13790-s001.pdf]

## A long pentraxin-3-derived pentapeptide for the therapy of FGF8b-driven steroid hormone-regulated cancers

### Supplementary Material

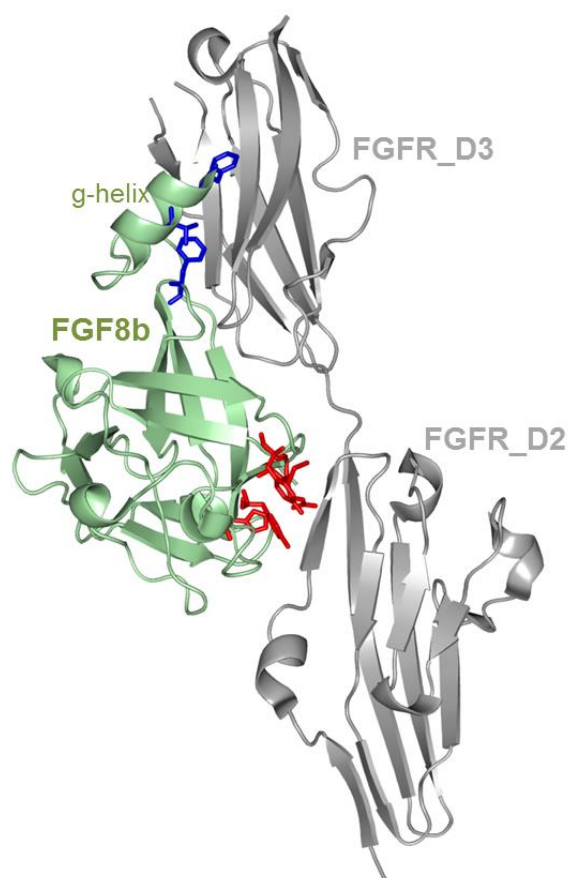

#### Supplemental Figure S1: Mode of FGF8b/FGFR interaction.

Residues belonging to the FGF8b hydrophobic interfaces with FGFR2c\_D2 and FGFR2c\_D3 are highlighted on the FGF8b structure as red and blue sticks, respectively (PDB ID: 2FDB). FGF8b and FGFR domains are shown as green and grey cartoons, respectively, and the N-terminal g-helix FGF8b(32-40) is indicated.
